# Supplementary material for: Interaction of Culture Medium and Artificial Light Type on Pigmentation of Micro-Propagated Opuntia Plants
Source: MDPI journal article supplement (doi:10.3390/horticulturae9121348), 2023-12-17
Supplement: s1 [file s1]

## Supplemental Material

### Statistical Data analysis

Table S1 shows the two tests performed, both the confidence intervals and the hypothesis test. As can be seen, the explants that are significantly different from the lower limit are in the A explants, for both Tapón aguanoso and Copena VI genotypes, which belong to the white and red LED lights. This means that there was a significant change in the growth of callus, roots and shoots in the explants. The difference from the value reported in both tests can be observed. In the C explants, a significant difference was observed only in Copena VI, as poor callus growth was observed in them. In the F explants, only the Tapón aguanoso explant is considered significant, since the white light contributed to the formation of shoots and callus but did not form roots. A clear trend can be observed that white and red LED light has an effect on the formation of shoots but does not contribute to the formation of callus.

**Table S1.** Hypothesis testing performed with a 95% confidence level

| Explant |           | Confidence interval                                                    |                         |                         | Hypothesis with confidence intervals |                     |                     | Hypothesis with value p |                     |                     |
|---------|-----------|------------------------------------------------------------------------|-------------------------|-------------------------|--------------------------------------|---------------------|---------------------|-------------------------|---------------------|---------------------|
| Cactus  | Genotype  | Callus                                                                 | Shoot                   | Roots                   | Callus                               | Shoot               | Roots               | Callus                  | Shoot               | Roots               |
|         | Type      | confidence interval                                                    | confidence interval     | confidence interval     |                                      |                     |                     | 0.05                    | 0.05                | 0.05                |
| A       | Tapón     | (1.273<1.4<1.527) 0.95                                                 | (1.192<1.7<2.208) 0.95  | (4.307<8.5<12.69) 0.95  | HA: is not rejected                  | HA: is not rejected | HA: is not rejected | HA: is not rejected     | HA: is not rejected | HA: is not rejected |
|         | Copena VI | (1.033<1.2<1.367) 0.95                                                 | (1.23<2.4<3.570) 0.95   | (3.336<7.6<11.86) 0.95  | HA: is not rejected                  | HA: is not rejected | HA: is not rejected | HA: is not rejected     | HA: is not rejected | HA: is not rejected |
| B       | Tapón     | There was no influence on explant growth in callus, shoots, and roots. |                         |                         |                                      |                     |                     |                         |                     |                     |
|         | Copena VI | The explant did not develop callus, shoots and roots.                  |                         |                         |                                      |                     |                     |                         |                     |                     |
| C       | Tapón     | (0.185<0.5<0.814) 0.95                                                 | (1.07<1.7<2.329) 0.95   | (1.767<4.6<7.433) 0.95  | H0. is not rejected                  | H0. is not rejected | H0. is not rejected | H0: is not rejected     | H0: is not rejected | H0: is not rejected |
|         | Copena VI | (0.515<0.7<0.884) 0.95                                                 | (0.33<0.7<1.069) 0.95   | (2.676<7.3<11.92) 0.95  | HA: is not rejected                  | HA: is not rejected | HA: is not rejected | HA: is not rejected     | HA: is not rejected | HA: is not rejected |
| D       | Tapón     |                                                                        | (-0.145<0.6<1.345) 0.95 | (7.058<8.3<9.542) 0.95  |                                      | H0. is not rejected | H0. is not rejected | No callus formation     | H0: is not rejected | H0: is not rejected |
|         | Copena VI |                                                                        | (-0.048<0.2<0.448) 0.95 | (-1.133<1.6<4.332) 0.95 |                                      | H0. is not rejected | H0. is not rejected | Absent                  | H0: is not rejected | H0: is not rejected |
| E       | Tapón     | (-3.452<4.0<11.45) 0.95                                                | (-0.069<0.8<1.669) 0.95 |                         | H0. is not rejected                  | H0. is not rejected |                     | H0: is not rejected     | H0: is not rejected | No roots formation  |

|   |               |                            |                            |                                  |                        |                                     |                                     |                        |                        |
|---|---------------|----------------------------|----------------------------|----------------------------------|------------------------|-------------------------------------|-------------------------------------|------------------------|------------------------|
| F | Copen<br>a VI | (0.3<0.3<0.3)<br>0.95      | (0.7<0.7<0.7) 0.95         | H0. is not<br>rejected           | H0. is not<br>rejected | standard<br>deviation<br>equal to 0 | standard<br>deviation<br>equal to 0 | Absent                 |                        |
|   | Tapón         | (1.225<4.0<6.77<br>4) 0.95 | (0.323<0.6<0.877 )<br>0.95 | HA: is not<br>rejected           | HA: is not<br>rejected | HA: is not<br>rejected              | HA: is not<br>rejected              | No roots<br>formation  |                        |
|   | Copen<br>a VI |                            | (0.7<0.7<0.7 ) 0.95        |                                  | H0. is not<br>rejected | Absent                              | standard<br>deviation<br>equal to 0 | Absent                 |                        |
| G | Tapón         |                            |                            |                                  |                        | Present                             | No effect in shoots and<br>roots.   |                        |                        |
|   | Copen<br>a VI |                            |                            |                                  |                        | Active                              | No present in shoots and<br>roots.  |                        |                        |
|   | Tapón         |                            |                            |                                  |                        | Active                              | No effect shoots and<br>roots.      |                        |                        |
| H | Copen<br>a VI |                            |                            |                                  |                        | Present                             | No present in shoots and<br>roots.  |                        |                        |
|   | Tapón         |                            |                            |                                  |                        |                                     |                                     |                        |                        |
|   | Copen<br>a VI |                            |                            |                                  |                        |                                     |                                     |                        |                        |
| I | Tapón         |                            | (1.107<2.1<3.093 )<br>0.95 | (2.465<4.7<6.<br>934 ) 0.95      | H0. is not<br>rejected | H0. is not<br>rejected              | Light                               | H0: is not<br>rejected | H0: is not<br>rejected |
|   | Copen<br>a VI |                            | (1.905<2.0<2.095 )<br>0.95 | (-<br>4.266<5.6<15.<br>46 ) 0.95 | H0. is not<br>rejected | H0. is not<br>rejected              | Light                               | H0: is not<br>rejected | H0: is not<br>rejected |
|   | Tapón         |                            | (0.104<0.8<1.495 )<br>0.95 |                                  | H0. is not<br>rejected |                                     | Light                               | H0: is not<br>rejected | Abscent                |
| J | Copen<br>a VI |                            | (0.177<0.4<0.622 )<br>0.95 |                                  | H0. is not<br>rejected |                                     | Light                               | H0: is not<br>rejected | No present             |
|   | Tapón         |                            | (0.386<1.5<2.613 )<br>0.95 | (6.657<17.<27<br>.34 ) 0.95      | H0. is not<br>rejected | H0. is not<br>rejected              | No effect                           | H0: is not<br>rejected | H0: is not<br>rejected |
|   | Copen<br>a VI |                            | (0.591<1.8<3.009 )<br>0.95 | (-<br>1.48<13.<27.4<br>8 ) 0.95  | H0. is not<br>rejected | H0. is not<br>rejected              | No present                          | H0: is not<br>rejected | H0: is not<br>rejected |
| K | Tapón         |                            |                            |                                  |                        |                                     |                                     |                        |                        |
|   | Copen<br>a VI |                            |                            |                                  |                        |                                     |                                     |                        |                        |
|   | Tapón         |                            |                            |                                  |                        |                                     |                                     |                        |                        |

|   |            |                                   |                     |            |            |                               |
|---|------------|-----------------------------------|---------------------|------------|------------|-------------------------------|
| L | Tapón      | (1.7<1.7<1.7 )<br>0.95            | H0. is not rejected | No present | Very small | standard deviation equal to 0 |
|   | Copen a VI | (-<br>12.574<2.7<17<br>.97 ) 0.95 | H0. is not rejected | No effect  | Too small  | H0: is not rejected           |
| M | Tapón      |                                   |                     | Occurrence | No present | No effect                     |
|   | Copen a VI |                                   |                     | Presence   | No effect  | Abscent                       |

---
